# Supplementary material for: Prediction of Chemotoxicity, Unplanned Hospitalizations and Early Death in Older Patients with Colorectal Cancer Treated with Chemotherapy
Source: MDPI journal article supplement (doi:10.3390/cancers14010127), 2021-12-28
Supplement: s1 [file s1]

**Supplementary Table S1. Summary of CGA Domains and Elements**

| Domains              | Elements of Assessment                                             | Range      | Cut-off |
|----------------------|--------------------------------------------------------------------|------------|---------|
| Functional status    | ECOG performance status                                            | 0-2        | 2       |
|                      | Activities of daily living (26)                                    | 0-6        | ≤ 5     |
|                      | Instrumental activities of daily living (27)                       | 0-8        | ≤ 7     |
|                      | Physical performance test SPPB (23)                                | 0-12       | ≤ 6     |
|                      | Nº of falls in the last 6 months                                   |            | ≥ 1     |
| Comorbidity          | Cumulative Illness Rating Scale for Geriatrics (CIRS-G score) (21) | 0-56       | ≥ 14    |
|                      | Charlson index (22)                                                | 0-25       | ≥ 2     |
| Psychological status | Hospital Anxiety Scale (28)                                        | 0-21       | ≥ 11    |
|                      | Hospital Depression Scale (28)                                     | 0-21       | ≥ 11    |
| Cognitive status     | Pfeiffer test (25)                                                 | 0-3 vs ≥ 2 |         |
| Social support       | MOS Social Support Survey (29)                                     | 0-25       | >15     |
| Nutritional status   | Body mass index                                                    | -          | <21     |
|                      | Percent unintentional weight lost in the last 6 months (%)         | -          | ≥5      |

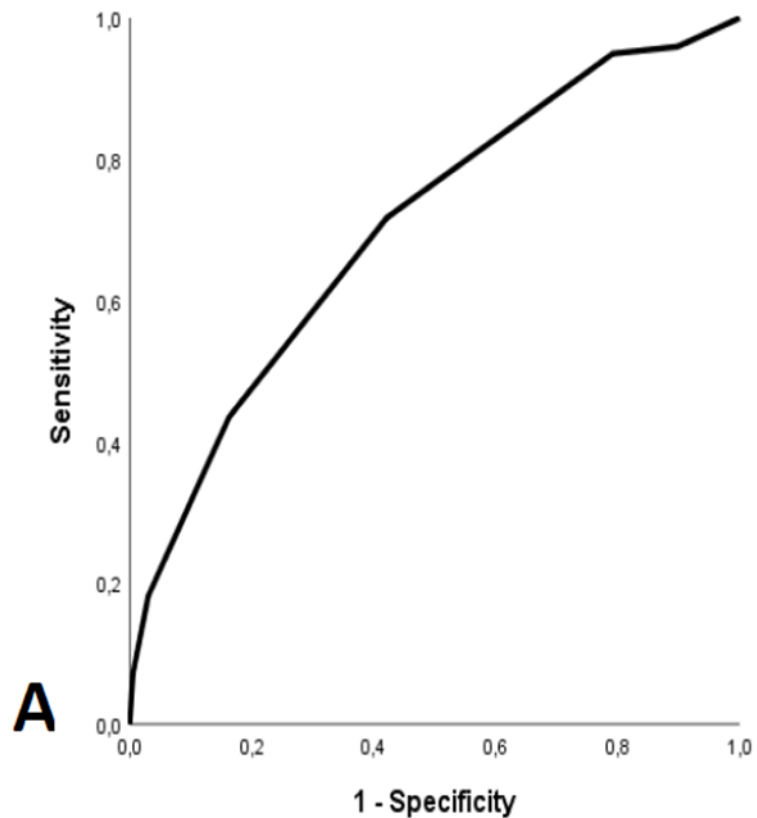

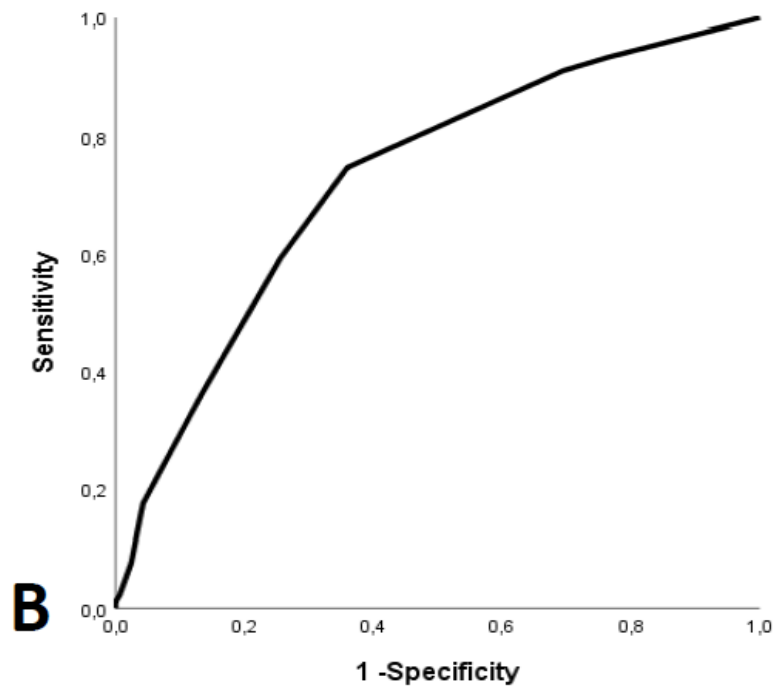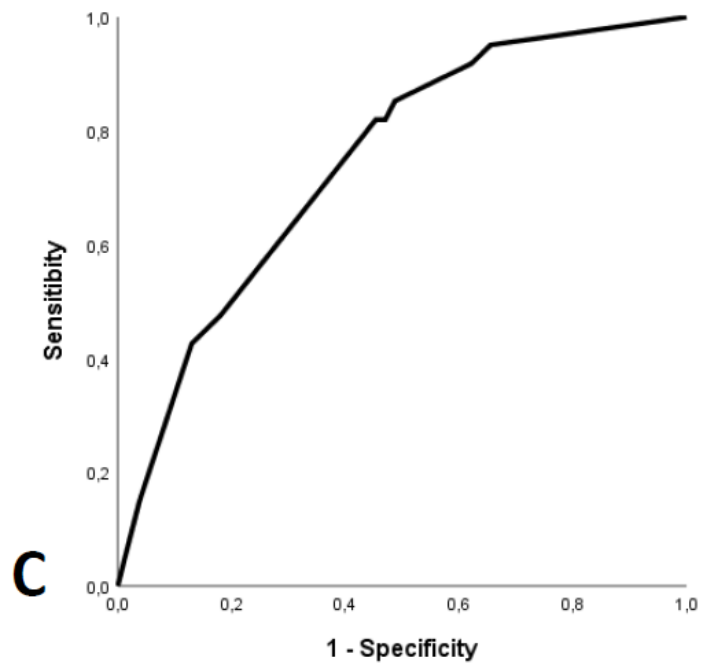

**Figure S1.** Receiver operating characteristic (ROC) analyses to assess the capacity of the predicting grade 3-4 toxicity (A), unplanned hospitalizations (B) and death at 6 months (C) .
